# Supplementary material for: Agrobacterial Transformation Enhancement by Improved Competent Cell Preparation and Optimized Electroporation
Source: Life (Basel). 2023 Nov 17;13(11):2217. doi: 10.3390/life13112217 (PMC10671908; doi:10.3390/life13112217)
Supplement: Supplementary file 1 [file life-13-02217-s001.zip]

Archive with 5 entries (5 files):
- Picture S1.jpg
- Picture S2.jpg
- Picture S3.jpg
- Picture S4.jpg
- Supplementary caption.pdf
